# Supplementary material for: Systematic Assessment of the Climate Sensitivity of Important Human and Domestic Animals Pathogens in Europe
Source: PubMed Central journal article supplement (PMC5541049; doi:10.1038/s41598-017-06948-9), 2017-08-02
Supplement: 41598_2017_6948_MOESM1_ESM.pdf [file 41598_2017_6948_MOESM1_ESM.pdf]

# Supplementary Information for

## **Systematic Assessment of the Climate Sensitivity of Important Human and Domestic Animals Pathogens in Europe**

### **Running title**

Infectious Disease Climate Sensitivity

**Authors** K. Marie McIntyre, Christian Setzkorn, Philip J. Hepworth, Serge Morand, Andrew P. Morse and Matthew Baylis

### **Further methods**

#### *H-index methodology*

We previously reported the use of the quantitative H-(Hirsch-)index methodology<sup>1</sup> for pathogens/diseases. This metric gauges the volume and citation rate of research on diseases or pathogens, serving as a proxy for more comprehensive measures including Disability-Adjusted Life Year estimates (DALYs)<sup>1</sup>. A tool like the H-index is essential for prioritizing large numbers of diseases, as lack of data would prohibit the use of more direct measures for the majority of infections. Furthermore, the H-index can also be readily applied to infectious diseases of animals<sup>2</sup>, while alternative methods for the prioritization of animal diseases would generally use different criteria to those used to prioritize human infections (such as economic impact).

### *Pathogen Information*

Information on the pathogens of humans and domestic animals, including the number of European countries where there is evidence for their presence was taken from the ENHanCEd Infectious Diseases 2 (EID2) database<sup>3,4</sup>. This database integrates published data sources (NCBI nucleotide metadata, and PubMed abstracts) allowing conclusions about pathogens, hosts and vectors to be drawn using evidence from individual reports, for example, that a certain pathogen infects a certain host, and was present in a certain country at a certain time. For our analysis, domestic animals were defined as mammals and birds farmed or regularly kept as pets in Europe (see Table S3). Europe included European states and transcontinental states (see Table S4).

### *Climate driver literature searching protocol*

Systematic literature searches were used to minimize bias in the identification of papers which possibly describe the climate drivers of pathogens. We did not publish a protocol in advance of the review.

Information sources - Searches of published scientific literature were undertaken in December 2011 using PubMed<sup>5</sup>.

Eligibility criteria - Searches were restricted to the years 1948 to 2011, inclusive, and there was no geographical restriction on where the papers originated from. English is used in PubMed, however searches also include foreign-language publication title translations. All literature in the PubMed database has been published.

Searches - Searches were undertaken using search phrases specified in quotation marks (“”), the ‘topic’ search field and with no lemmatization. A list of climate driver terms

(n=190, see Table S5) was compiled by the study authors using manual searches of scientific literature to identify keywords or phrases describing climate drivers likely to impact pathogens. Search phrases were compiled which included a climate driver term, the pathogen scientific name, alternative names, synonyms and alternative spellings according to NCBI Taxonomy<sup>6</sup>. Virus searches also included synonyms and acronyms from the NCBI Taxonomy database<sup>4</sup> and International Committee on Taxonomy of Viruses<sup>6,7</sup>, and the term ‘virus’, and excluded other entities (viral or non-viral) which shared acronyms; the search terms describing pathogens are available in the EID2<sup>3,4</sup>. The Boolean operator ‘AND’ was used to link each climate driver term with the pathogen name phrase, ‘OR’ was used between each element of the pathogen name, and ‘NOT’ was used where necessary to exclude viral or non-viral entities sharing virus acronyms. Individual literature searches were undertaken for combinations of every pathogen and climate term.

### *Systematic reviewing of literature*

The individual searches on each climate term and pathogen combination produced a database of approximately 27,000 rows of data, each linked to a published paper. The papers described within the database were stratified according to pathogen name and a climate driver grouping term, hereafter referred to as climate drivers, (e.g. the climate terms ‘ambient temperature’ and ‘air temperature’ were included in a grouping term ‘temperature’; see Table S5), and the results were pooled for all of the terms per group. Each set of pooled papers was then prioritized for reading, according to the impact factor

of the journal in which they were published and the year of publication (with the highest impact factor and most recent publication given highest priority).

The reviewing and scoring procedure for each set of papers is summarized (see Figure S1). First, papers were accepted or rejected from the study based on two inclusion criteria: (i) whether the paper was about a climate driver of disease (for example, whether temperature refers to the climate variable rather than fever), and (ii) whether the paper investigated a quantitative relationship between the level of the driver and disease (i.e. quantified the health outcome, if not, it is not possible to draw conclusions about how a change in the driver might affect disease). The second step was to score accepted papers based upon a number of data categories: the type of analysis; the strength of statistical evidence for an effect of a climate driver acting upon a pathogen; and whether the publication suggested that the climate driver effect did or did not affect the pathogen. The acceptance or rejection of papers and the scoring of accepted papers was undertaken by one of two researchers, using a standardized data collection form. Prior to the reviewing process, a subset of studies (N=100) were accepted or rejected and scored by both researchers, and any differences were resolved by discussion leading to agreement on the interpretation of data categories. The final scores were combined multiplicatively. (Outcomes ranged from 80 to -80. A score of 80 corresponded to the strongest evidence for an effect of climate on disease, and a score of -80 corresponded to the strongest evidence for the lack of an effect of climate on disease). In each case, a maximum of 20 papers were examined to look for the effect of a climate driver upon a pathogen, and a maximum of 5 papers were scored. This minimized biases arising as a result of the

number of publications describing a pathogen/climate driver combination. The reviewing procedure, where papers were accepted or rejected for further systematic reviewing was undertaken for studies describing N=4959 pathogen and climate driver relationships. Of these, N=661 relationships were accepted within the review and scored for evidence describing a quantitative relationship between the level of the climate driver and disease (see Figure S1), from a total of N=542 scientific publications.

#### *Transmission routes for pathogens*

We obtained the major transmission routes for our 157 pathogens using two methods. First, we undertook manual searches of text books on the infectious diseases of humans and relevant domestic animals<sup>8-15</sup>. These results were supplemented with output from semi-automated literature searches which recorded the frequency of papers associated with combinations of pathogens and certain keywords/phrases that describe potential transmission routes; transmission routes were confirmed by reading the papers identified for each pathogen/keyword combination. Transmission routes were not considered for pathogens which are part of the natural biome.

#### *Emerging/zoonotic pathogen status*

Information on whether pathogens were zoonotic, non-zoonotic, emerging and not emerging was examined based upon previously published information<sup>16,17</sup>. If not included in earlier work or if their status had changed due to more recent scientific evidence, updated pathogen information was based upon the same definitions. Zoonotic pathogens were classified as those naturally transmitted between vertebrate (non-human)

animals and humans, not including species which have recently evolved from animal pathogens but are no longer transmitted between animals and humans<sup>16,18</sup>. Emerging pathogens are those that have appeared in a host population for the first time (including newly-evolved strains), or have occurred previously but are increasing in incidence or expanding into areas where they had not previously been reported<sup>16,18</sup>. Pathogens needed to have emerged in several geographically distinct areas to be 'emerging'.

### *Statistical analyses*

The relationship between the frequency of climate drivers and transmission routes associated with pathogens was explored using Pearson's product-moment correlation analyses. The relationship between the number of European countries with evidence of pathogen presence and the frequency of climate drivers was examined using a linear model which also included the frequency of transmission routes associated with a pathogen as a covariate. Pearson's Chi-squared tests with Yates' continuity correction were used to establish if pathogens with positive evidence of climate drivers were more or less likely to be zoonotic compared to affecting humans or animals-only, or classed as emerging compared to not emerging. Binomial logistic regression models were used to explore relationships between climate drivers and emerging pathogen status in models which also explored the effects of zoonotic disease status, (quartiles describing) H-indices for pathogens, and taxonomic division. Binomial logistic regression models were also used to explore relationships between evidence for the number of and certain transmission routes and zoonotic status, including (quartiles describing) H-indices for pathogens. After climate drivers or transmission routes with some evidence of an effect

were identified ( $P < 0.3$ ), these were then incorporated into multivariable models using a forward stepwise approach. R was used for all statistical analyses<sup>19</sup>, with statistical significance determined by a P-value of 0.05 or less.

**Figure S1. Reviewing process for each paper and climate driver and pathogen combination.**

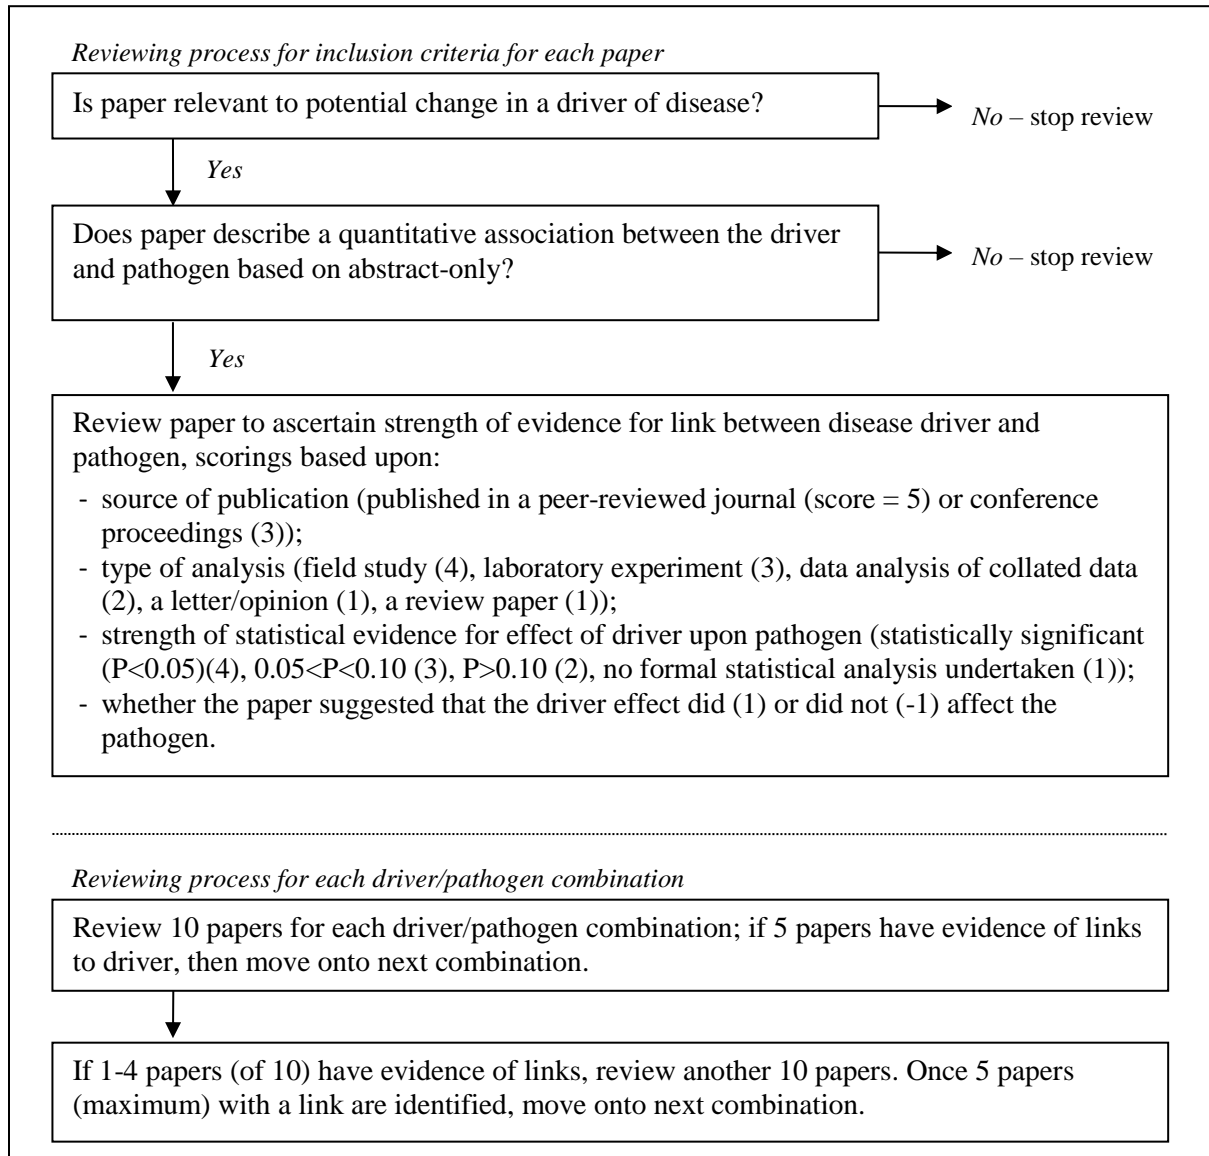



**Table S1.** Top 100 human pathogens of Europe, prioritized according to the H-index methodology <sup>1</sup>. <sup>a</sup> Pathogens include those which are zoonotic (Z), non-zoonotic (NZ), emerging (E) and not emerging (NE) according either to <sup>16,17</sup> or given a new status (NS) in this work. Pathogens also included in the list of top 100 animal pathogens are noted (A). <sup>b</sup> Climate drivers with positive evidence include: altitude (Alt), climate change (CC), extreme weather events (EWE), moisture (M), oscillations (O), particle matter (P), rainfall (R), salinity (S), temperature (T), vegetation (V) and wind (W). <sup>c</sup> Transmission routes include: airborne (via inhalation) (air), direct (non-sexual) contact (dcont), fomite (fom), foodborne (via ingestion) (food), direct sexual contact - (sex), soil-borne (soil), vector-borne (vect) and waterborne (wat). <sup>d</sup> Taxonomic divisions (TD) of pathogens include: bacteria (B), fungi (F), helminthes (H), protozoa (P) and viruses (V).

| Pathogen name <sup>a</sup>               | Climate drivers <sup>b</sup> | Transmission routes <sup>c</sup> | TD <sup>d</sup> | H-index score | Pathogen name <sup>a</sup>                           | Climate drivers <sup>b</sup> | Transmission routes <sup>c</sup> | TD <sup>d</sup> | H-index score |
|------------------------------------------|------------------------------|----------------------------------|-----------------|---------------|------------------------------------------------------|------------------------------|----------------------------------|-----------------|---------------|
| <i>Escherichia coli</i> , Z, E, A        | Alt, EWE, W                  | dcont, wat, food                 | B               | 524           | <i>Streptococcus pyogenes</i> , Z, E                 |                              | dcont, wat, air, food            | B               | 113           |
| Human Immunodeficiency Virus 1, NZ, E    |                              | sex                              | V               | 410           | <i>Bacillus cereus</i> , Z, NE, A                    | P                            | air, food                        | B               | 111           |
| Human Immunodeficiency Virus 2, NZ, E    |                              | sex                              | V               | 399           | <i>Aspergillus niger</i> , Z, NE                     | Alt, M, S, W                 | air                              | F               | 110           |
| Hepatitis C Virus, NZ, E                 |                              | sex                              | V               | 289           | <i>Burkholderia cepacia</i> , NZ, NE                 |                              | dcont, soil, wat, air, fom       | B               | 107           |
| <i>Staphylococcus aureus</i> , Z, E, A   | EWE, M, S                    | dcont, fom, food                 | B               | 271           | <i>Clostridium botulinum</i> , Z, E, A               | P, W                         | soil, food                       | B               | 106           |
| Human Herpesvirus 4, NZ, NE              |                              | dcont                            | V               | 257           | Encephalomyocarditis Virus, Z, NE, A                 | M                            | wat, fom, food                   | V               | 105           |
| <i>Helicobacter pylori</i> , Z, NE, A    | Alt, R                       | dcont, sex, fom, food            | B               | 246           | <i>Yersinia pestis</i> , Z, E, A                     | CC, O, R                     | dcont, vect, food                | B               | 105           |
| Hepatitis B Virus, NZ, E                 | R                            | dcont, sex                       | V               | 246           | <i>Streptococcus mutans</i> , NZ, NE                 |                              |                                  | B               | 104           |
| <i>Pseudomonas aeruginosa</i> , Z, E, A  | M                            | wat, air, fom, food              | B               | 243           | <i>Aggregatibacter actinomycetemcomitans</i> , Z, NE |                              | dcont                            | B               | 101           |
| <i>Mycobacterium tuberculosis</i> , Z, E | Alt                          | air                              | B               | 238           | <i>Clostridium perfringens</i> , Z, NE, A            | EWE, P                       | soil, food                       | B               | 101           |
| Human Papillomavirus, NZ, E              |                              | dcont, sex                       | V               | 235           | <i>Serratia marcescens</i> , Z, E                    | T                            | dcont, fom                       | B               | 100           |
| <i>Bacillus subtilis</i> , Z, NE         | M                            | food                             | B               | 219           | <i>Yersinia pseudotuberculosis</i> , Z, NE, A        | EWE, R                       | dcont, wat, food                 | B               | 99            |
| <i>Listeria monocytogenes</i> , Z, E, A  | EWE, P, R, S, T              | food                             | B               | 207           | <i>Entamoeba histolytica</i> , Z, NE, A              | CC, M, R                     | wat, food                        | P               | 98            |

|                                                 |                                    |                                   |   |     |                                                                                   |                        |                              |   |    |
|-------------------------------------------------|------------------------------------|-----------------------------------|---|-----|-----------------------------------------------------------------------------------|------------------------|------------------------------|---|----|
| <i>Streptococcus pneumoniae</i> , Z, E          | CC, M, R,<br>T, W                  | dcont                             | B | 199 | <i>Leishmania donovani</i> , Z, E, A                                              | Alt, M                 | vect                         | P | 98 |
| <i>Candida albicans</i> , Z, E, A               |                                    | dcont, sex,<br>fom                | F | 181 | <i>Bacteroides fragilis</i> , Z, NE, A                                            | T                      |                              | B | 97 |
| Human Herpesvirus 1, NZ, E                      |                                    | dcont, sex                        | V | 171 | <i>Gibberella moniliformis</i> , NZ, E                                            | M, R, T                | food                         | F | 97 |
| Respiratory Syncytial Virus, NZ, NE             | Alt, M, R,<br>W                    | air, fom                          | V | 164 | West Nile Virus, Z, E, A                                                          | CC, EWE,<br>M, R, T, V | vect                         | V | 97 |
| Human Herpesvirus 5, NZ, E                      |                                    | dcont, sex                        | V | 159 | Human Herpesvirus 2, NZ, E                                                        |                        | dcont, sex                   | V | 96 |
| <i>Haemophilus influenzae</i> , NZ, E           |                                    | dcont, air                        | B | 148 | Rabies Virus, Z, E, A                                                             | Alt, R                 | dcont                        | V | 96 |
| Lymphocytic Choriomeningitis Virus,<br>Z, NE, A |                                    | dcont, air                        | V | 148 | Hepatitis A Virus, Z, E                                                           | EWE, O, R              | dcont, sex,<br>wat, food     | V | 95 |
| <i>Toxoplasma gondii</i> , Z, E, A              | Alt, CC,<br>EWE, M, R              | wat, food                         | P | 148 | Human Herpesvirus 6, NZ, NE                                                       |                        | dcont                        | V | 94 |
| <i>Klebsiella pneumoniae</i> , Z, E, A          | M                                  | dcont, air                        | B | 146 | <i>Fusarium oxysporum</i> , NZ, E                                                 | P                      | air, food                    | F | 93 |
| <i>Vibrio cholerae</i> , NZ, E                  | CC, EWE,<br>M, O, P, R,<br>S, T, W | wat, food                         | B | 145 | <i>Mycoplasma pneumoniae</i> , NZ, NE                                             | M, T                   | air                          | B | 93 |
| <i>Borrelia burgdorferi</i> , Z, E, A           | Alt, CC, M,<br>O, R, T, V          | vect                              | B | 144 | <i>Cryptosporidium parvum</i> , Z, E, A                                           | EWE, P, R,<br>S, T     | dcont, wat,<br>food          | P | 92 |
| <i>Chlamydophila pneumoniae</i> , Z, NE, A      | M                                  | air                               | B | 143 | <i>Enterobacter cloacae</i> , Z, NE, A                                            | P                      | dcont, food                  | B | 90 |
| <i>Shigella flexneri</i> , Z, NE                | EWE, R                             | dcont, sex,<br>wat, vect,<br>food | B | 142 | <i>Aeromonas hydrophila</i> , Z, E, A                                             | EWE, M,<br>R, S        | wat, food                    | B | 89 |
| Human Herpesvirus 8, NZ, E                      |                                    | dcont, sex                        | V | 140 | <i>Acinetobacter baumannii</i> , NZ, NE, A                                        | M, P, T                | soil, wat, air,<br>fom, food | B | 88 |
| <i>Escherichia coli</i> O157:h7, Z, E           | EWE, R                             | dcont, wat,<br>food               | B | 138 | <i>Candida glabrata</i> , Z, E                                                    |                        | dcont, sex,<br>fom           | F | 87 |
| Human T-lymphotropic Virus 1, NZ, E             | Alt                                | dcont, sex                        | V | 137 | <i>Moraxella catarrhalis</i> , NZ, NE                                             | R                      | air                          | B | 87 |
| <i>Neisseria gonorrhoeae</i> , NZ, E            |                                    | sex                               | B | 136 | <i>Salmonella enterica</i> subsp. <i>enterica</i><br>serovar enteritidis, Z, E, A | P                      | dcont, food                  | B | 87 |
| Influenza A Virus, Z, E, A                      | CC, M, P,<br>R, S, T               | air                               | V | 135 | <i>Treponema pallidum</i> , NZ, E                                                 |                        | dcont, sex,<br>food          | B | 87 |
| <i>Legionella pneumophila</i> , NZ, E           | P, R, W                            | air                               | B | 133 | <i>Trichomonas vaginalis</i> , NZ, E                                              |                        | sex                          | P | 87 |
| <i>Enterococcus faecalis</i> , Z, E             | S                                  | dcont                             | B | 132 | <i>Rhizopus oryzae</i> , Z, NE                                                    |                        | air                          | F | 86 |
| <i>Mycobacterium bovis</i> , Z, E, A            | Alt, EWE                           | air, food                         | B | 132 | Hepatitis E Virus, Z, E                                                           | EWE, R                 | wat, food                    | V | 83 |
| <i>Campylobacter jejuni</i> , Z, E, A           | M, R                               | dcont, wat,<br>food               | B | 130 | Human Parvovirus b19, NZ, E                                                       |                        | dcont, air                   | V | 81 |
| <i>Neisseria meningitidis</i> , NZ, E           | M, P                               | dcont, air                        | B | 130 | <i>Proteus mirabilis</i> , Z, NE, A                                               |                        |                              | B | 80 |
| <i>Chlamydia trachomatis</i> , Z, E             | Alt, EWE,<br>M, R                  | dcont, sex                        | B | 129 | <i>Shigella dysenteriae</i> , Z, E                                                | R                      | dcont, wat,<br>vect, food    | B | 80 |
| <i>Clostridium difficile</i> , Z, E, A          | R                                  | dcont, fom,<br>food               | B | 127 | <i>Stenotrophomonas maltophilia</i> , NZ, NE                                      |                        | wat, fom,<br>food            | B | 80 |
| <i>Cryptococcus neoformans</i> , Z, E, A        | M, R                               | air                               | F | 126 | <i>Bacillus licheniformis</i> , Z, NE, A                                          | P                      | food                         | B | 78 |

|                                             |                         |                         |   |     |                                                                                   |                       |                         |   |    |
|---------------------------------------------|-------------------------|-------------------------|---|-----|-----------------------------------------------------------------------------------|-----------------------|-------------------------|---|----|
| <i>Yersinia enterocolitica</i> , Z, E, A    |                         | dcont, food             | B | 126 | <i>Mycoplasma genitalium</i> , NZ, NE                                             |                       | sex                     | B | 78 |
| Mouse Mammary Tumour Virus, Z, E, NS        |                         |                         | V | 125 | <i>Trichinella spiralis</i> , Z, E, A                                             | Alt, M                | food                    | H | 78 |
| <i>Mycobacterium avium</i> , Z, E           | Alt, P, R               | wat, air, food          | B | 125 | <i>Bartonella henselae</i> , Z, NE, A                                             | M, R                  | dcont, vect             | B | 77 |
| <i>Bacillus anthracis</i> , Z, E, A         | CC, M, P,<br>R, T, V, W | soil, air, fom,<br>food | B | 122 | <i>Salmonella enterica</i> subsp. <i>enterica</i><br>serovar typhimurium, Z, E, A | M, P, R, T            | wat, food               | B | 77 |
| <i>Bordetella pertussis</i> , NZ, E         |                         | air                     | B | 122 | <i>Brucella abortus</i> , Z, E, A                                                 | M, O                  | dcont, air,<br>food     | B | 76 |
| Measles Virus, Z, E                         |                         | air                     | V | 119 | <i>Candida tropicalis</i> , Z, NE                                                 |                       | dcont, sex,<br>fom      | F | 76 |
| Human Enterovirus C, NZ, NE                 | M, S                    | dcont, air,<br>fom      | V | 118 | <i>Pseudomonas stutzeri</i> , NZ, NE                                              |                       |                         | B | 76 |
| <i>Enterococcus faecium</i> , Z, E          | T                       | dcont                   | B | 116 | SARS coronavirus, Z, E, NS                                                        | T                     | dcont, air,<br>fom      | V | 76 |
| <i>Staphylococcus epidermidis</i> , Z, E, A | P                       | fom, food               | B | 114 | <i>Enterobacter aerogenes</i> , Z, NE, A                                          | T                     | dcont, food             | B | 75 |
| Human Herpesvirus 3, NZ, E                  | M                       | dcont, air              | V | 113 | <i>Francisella tularensis</i> , Z, E, A                                           | R, T                  | wat, air, vect,<br>food | B | 74 |
| <i>Porphyromonas gingivalis</i> , Z, NE     | T                       |                         | B | 113 | <i>Vibrio parahaemolyticus</i> , Z, E                                             | EWE, O, P,<br>R, S, T | food                    | B | 74 |

**Table S2.** Top 100 domestic animal pathogens of Europe prioritized according to the H-index methodology <sup>1</sup>. <sup>a</sup> The emerging and zoonotic definitions are the same as for Table S1. Pathogens also included in the list of top 100 human pathogens are noted (H). <sup>b</sup> Climate drivers with positive evidence include: altitude (Alt), climate change (CC), extreme weather events (EWE), moisture (M), oscillations (O), particle matter (P), rainfall (R), salinity (S), temperature (T), vegetation (V) and wind (W). <sup>c</sup> Transmission routes include: airborne (via inhalation) (air), direct (non-sexual) contact (dcont), fomite (fom), foodborne (via ingestion) (food), direct sexual contact - (sex), soil-borne (soil), vector-borne (vect) and waterborne (wat). <sup>d</sup> Taxonomic divisions (TD) of pathogens include: bacteria (B), fungi (F), helminthes (H), protozoa (P) and viruses (V).

| Pathogen name <sup>a</sup>                   | Climate drivers <sup>b</sup> | Transmission routes <sup>c</sup> | TD <sup>d</sup> | H-index score | Pathogen name <sup>a</sup>                                                     | Climate drivers <sup>b</sup> | Transmission routes <sup>c</sup> | TD <sup>d</sup> | H-index score |
|----------------------------------------------|------------------------------|----------------------------------|-----------------|---------------|--------------------------------------------------------------------------------|------------------------------|----------------------------------|-----------------|---------------|
| <i>Escherichia coli</i> , Z, E, H            | Alt, EWE, W                  | dcont, wat, food                 | B               | 524           | <i>Salmonella enterica</i> subsp. <i>enterica</i> serovar typhimurium, Z, E, H | M, P, R, T                   | wat, food                        | B               | 77            |
| <i>Staphylococcus aureus</i> , Z, E, H       | EWE, M, S                    | dcont, fom, food                 | B               | 271           | <i>Brucella abortus</i> , Z, E, H                                              | M, O                         | dcont, air, food                 | B               | 76            |
| <i>Helicobacter pylori</i> , Z, NE, H        | Alt, R                       | dcont, sex, fom, food            | B               | 246           | <i>Enterobacter aerogenes</i> , Z, NE, H                                       | T                            | dcont, food                      | B               | 75            |
| <i>Pseudomonas aeruginosa</i> , Z, E, H      | M                            | wat, air, fom, food              | B               | 243           | <i>Francisella tularensis</i> , Z, E, H                                        | R, T                         | wat, air, vect, food             | B               | 74            |
| <i>Listeria monocytogenes</i> , Z, E, H      | EWE, P, R, S, T              | food                             | B               | 207           | <i>Haemonchus contortus</i> , NZ, NE, NS                                       | CC, EWE, M, R, T             | food                             | H               | 74            |
| Murine Leukemia Virus, Z, E, NS              |                              |                                  | V               | 184           | <i>Neospora caninum</i> , NZ, NE, NS                                           | M, R, T                      | wat, food                        | P               | 72            |
| <i>Candida albicans</i> , Z, E, H            |                              | dcont, sex, fom                  | F               | 181           | Cowpox Virus, Z, E, NS                                                         |                              | dcont                            | V               | 71            |
| Lymphocytic Choriomeningitis Virus, Z, NE, H |                              | dcont, air                       | V               | 148           | Bovine Herpesvirus 1, NZ, NE, NS                                               | Alt, T                       | dcont, sex, air                  | V               | 70            |
| <i>Toxoplasma gondii</i> , Z, E, H           | Alt, CC, EWE, M, R           | wat, food                        | P               | 148           | <i>Citrobacter freundii</i> , NZ, E, NS                                        |                              | food                             | B               | 70            |
| <i>Klebsiella pneumoniae</i> , Z, E, H       | M                            | dcont, air                       | B               | 146           | Feline Leukemia Virus, NZ, NE, NS                                              |                              | dcont                            | V               | 69            |
| <i>Borrelia burgdorferi</i> , Z, E, H        | Alt, CC, M, O, R, T, V       | vect                             | B               | 144           | <i>Fasciola hepatica</i> , Z, E, NS                                            | Alt, CC, EWE, M, R, T, V     | vect, food                       | H               | 68            |
| <i>Chlamydophila pneumoniae</i> , Z, NE, H   | M                            | air                              | B               | 143           | Reticuloendotheliosis virus, NZ, NE, NS                                        |                              | dcont                            | V               | 68            |
| Influenza A Virus, Z, E, H                   | CC, M, P, R, S, T            | air                              | V               | 135           | <i>Coxiella burnetii</i> , Z, E, NS                                            | M, P, R, W                   | air, vect, food                  | B               | 67            |
| <i>Mycobacterium bovis</i> , Z, E, H         | Alt, EWE                     | air, food                        | B               | 132           | <i>Mannheimia haemolytica</i> , Z, NE, NS                                      | M, P, T                      | air                              | B               | 67            |

|                                                     |                         |                          |   |     |                                                                   |                        |                     |   |    |
|-----------------------------------------------------|-------------------------|--------------------------|---|-----|-------------------------------------------------------------------|------------------------|---------------------|---|----|
| <i>Campylobacter jejuni</i> , Z, E, H               | M, R                    | dcont, wat,<br>food      | B | 130 | Infectious Bronchitis Virus, NZ, NE, NS                           |                        | air                 | V | 66 |
| <i>Clostridium difficile</i> , Z, E, H              | R                       | dcont, fom,<br>food      | B | 127 | <i>Klebsiella oxytoca</i> , NZ, NE, NS                            | P                      | fom, food           | B | 66 |
| <i>Cryptococcus neoformans</i> , Z, E, H            | M, R                    | air                      | F | 126 | <i>Ascaris suum</i> , Z, NE, NS                                   | Alt                    | food                | H | 65 |
| <i>Yersinia enterocolitica</i> , Z, E, H            |                         | dcont, food              | B | 126 | Borna Disease Virus, Z, E, NS                                     |                        | dcont, fom,<br>food | V | 65 |
| <i>Bacillus anthracis</i> , Z, E, H                 | CC, M, P,<br>R, T, V, W | soil, air, fom,<br>food  | B | 122 | Bovine Leukemia Virus, NZ, NE, NS                                 |                        | dcont, vect         | V | 65 |
| <i>Staphylococcus epidermidis</i> , Z, E, H         | P                       | fom, food                | B | 114 | <i>Campylobacter coli</i> , Z, NE, NS                             | T                      | dcont, wat,<br>food | B | 65 |
| <i>Bacillus cereus</i> , Z, NE, H                   | P                       | air, food                | B | 111 | Canine parvovirus, NZ, NE, NS                                     |                        | dcont, fom,<br>food | V | 65 |
| <i>Clostridium botulinum</i> , Z, E, H              | P, W                    | soil, food               | B | 106 | Parainfluenza Virus 5, Z, NE, NS                                  |                        |                     | V | 65 |
| Suid Herpesvirus 1, NZ, NE, NS                      | M, W                    | dcont, sex, air,<br>food | V | 106 | <i>Pasteurella multocida</i> , Z, NE, NS                          | M, P                   | dcont, wat, air     | B | 65 |
| Encephalomyocarditis Virus, Z, NE, H                | M                       | wat, fom,<br>food        | V | 105 | Porcine Circovirus, NZ, E, NS                                     | P                      | dcont               | V | 65 |
| <i>Yersinia pestis</i> , Z, E, H                    | CC, O, R                | dcont, vect,<br>food     | B | 105 | Porcine Reproductive and Respiratory<br>Syndrome Virus, NZ, E, NS | M, T                   | dcont, sex, air     | V | 65 |
| Bovine Spongiform Encephalopathy<br>Agent, Z, E, NS |                         | food                     | V | 101 | Bluetongue Virus, NZ, E, NS                                       | Alt, CC, M,<br>T, V, W | vect                | V | 64 |
| <i>Clostridium perfringens</i> , Z, NE, H           | EWE, P                  | soil, food               | B | 101 | <i>Chlamydomphila abortus</i> , Z, E, NS                          | P                      | dcont, air,<br>food | B | 63 |
| <i>Yersinia pseudotuberculosis</i> , Z, NE, H       | EWE, R                  | dcont, wat,<br>food      | B | 99  | <i>Chlamydomphila psittaci</i> , Z, E, NS                         | P                      | dcont, air,<br>fom  | B | 63 |
| <i>Entamoeba histolytica</i> , Z, NE, H             | CC, M, R                | wat, food                | P | 98  | <i>Enterococcus hirae</i> , Z, NE, NS                             |                        |                     | B | 63 |
| <i>Leishmania donovani</i> , Z, E, H                | Alt, M                  | vect                     | P | 98  | Gallid Herpesvirus 2, NZ, NE, NS                                  | P                      | air, food           | V | 63 |
| <i>Bacteroides fragilis</i> , Z, NE, H              | T                       |                          | B | 97  | <i>Anaplasma phagocytophilum</i> , Z, E, NS                       | Alt, CC, M,<br>R, T, V | vect                | B | 62 |
| West Nile Virus, Z, E, H                            | CC, EWE,<br>M, R, T, V  | vect                     | V | 97  | Equine Infectious Anemia Virus, NZ, NE,<br>NS                     |                        | vect                | V | 62 |
| Rabies Virus, Z, E, H                               | Alt, R                  | dcont                    | V | 96  | <i>Streptococcus agalactiae</i> , Z, E, NS                        |                        | sex                 | B | 62 |
| Bovine Papillomavirus, NZ, E, NS                    |                         | dcont                    | V | 95  | <i>Echinococcus granulosus</i> , Z, E, NS                         | CC, EWE,<br>M, R, T    | food                | H | 61 |
| Newcastle Disease Virus, Z, NE, NS                  | P                       | dcont, air,<br>fom, food | V | 93  | Equine Arteritis Virus, NZ, E, NS                                 |                        | sex, air, fom       | V | 61 |
| <i>Cryptosporidium parvum</i> , Z, E, H             | EWE, P, R,<br>S, T      | dcont, wat,<br>food      | P | 92  | Maedi-Visna Virus, NZ, NE, NS                                     |                        | dcont, air          | V | 61 |
| <i>Enterobacter cloacae</i> , Z, NE, H              | P                       | dcont, food              | B | 90  | Canine Distemper Virus, NZ, E, NS                                 | R                      | dcont, air          | V | 60 |
| <i>Aeromonas hydrophila</i> , Z, E, H               | EWE, M,<br>R, S         | wat, food                | B | 89  | Chicken Anaemia Virus, NZ, E, NS                                  |                        | dcont, air,<br>food | V | 60 |

|                                                                                |         |                           |   |    |                                                    |                 |                  |   |    |
|--------------------------------------------------------------------------------|---------|---------------------------|---|----|----------------------------------------------------|-----------------|------------------|---|----|
| Foot-and-Mouth Disease Virus, Z, NE                                            | M, W    | dcont, air, fom           | V | 89 | Equid Herpesvirus 1, NZ, E, NS                     |                 | dcont, air, fom  | V | 60 |
| <i>Acinetobacter baumannii</i> , NZ, NE, H                                     | M, P, T | soil, wat, air, fom, food | B | 88 | Infectious Bursal Disease Virus, NZ, NE, NS        |                 | wat, fom, food   | V | 60 |
| <i>Salmonella enterica</i> subsp. <i>enterica</i> serovar enteritidis, Z, E, H | P       | dcont, food               | B | 87 | Transmissible Gastroenteritis Virus, NZ, NE, NS    | M, T            | dcont, fom, food | V | 60 |
| Classical Swine Fever Virus, NZ, NE, NS                                        | M, T, W | dcont, air, fom, vect     | V | 84 | <i>Actinobacillus pleuropneumoniae</i> , NZ, E, NS |                 | dcont, air, fom  | B | 59 |
| Bovine Viral Diarrhoea Virus 1, NZ, E, NS                                      | Alt     | dcont, sex, fom, vect     | V | 80 | Feline Calicivirus, Z, E, NS                       |                 | dcont, fom       | V | 59 |
| Feline Immunodeficiency Virus, NZ, E, NS                                       |         | dcont                     | V | 80 | Myxoma Virus, NZ, NE, NS                           | W               | dcont, air, vect | V | 59 |
| <i>Proteus mirabilis</i> , Z, NE, H                                            |         |                           | B | 80 | <i>Encephalitozoon cuniculi</i> , Z, E, NS         | S               | dcont, wat, food | F | 58 |
| <i>Mycobacterium avium</i> subsp. <i>paratuberculosis</i> , NZ, E, NS          | P, R    | dcont, fom, food          | B | 79 | Rotavirus A, Z, E, NS                              | EWE, M, P, R    | dcont, air       | V | 58 |
| Scrapie Agent, NZ, NE, NS                                                      |         | dcont, fom, food          | V | 79 | <i>Campylobacter fetus</i> , Z, E, NS              |                 | dcont, food      | B | 57 |
| <i>Bacillus licheniformis</i> , Z, NE, H                                       | P       | food                      | B | 78 | Fowlpox Virus, NZ, NE, NS                          |                 | air, fom, vect   | V | 57 |
| <i>Trichinella spiralis</i> , Z, E, H                                          | Alt, M  | food                      | H | 78 | <i>Leishmania infantum</i> , Z, E, NS              | Alt, M, R, T, W | vect             | P | 57 |
| <i>Bartonella henselae</i> , Z, NE, H                                          | M, R    | dcont, vect               | B | 77 | <i>Trichostrongylus colubriformis</i> , Z, NE, NS  | M, R            | wat, food        | H | 57 |

**Table S3.** Animal species including humans for which pathogens have been studied, including domestic animals we eat or companion animals we keep as pets, and exotic animals also used as food sources or as pets.

| <b>Scientific name</b>         | <b>Common name</b>  | <b>Scientific name</b>         | <b>Common name</b>    |
|--------------------------------|---------------------|--------------------------------|-----------------------|
| <i>Agapornis personata</i>     | Masked lovebird     | <i>Lama glama</i>              | Lama                  |
| <i>Agapornis roseicollis</i>   | Rosy-faced lovebird | <i>Lama pacos</i>              | Alpaca                |
| <i>Anas platyrhynchos</i>      | Domestic duck       | <i>Meleagris gallopavo</i>     | Turkey                |
| <i>Anser anser</i>             | Domestic goose      | <i>Melopsittacus undulatus</i> | Budgerigar            |
| <i>Bison bison</i>             | American bison      | <i>Meriones unguiculatus</i>   | Mongolian gerbil      |
| <i>Bison bonasus</i>           | European bison      | <i>Mesocricetus auratus</i>    | Syrian golden hamster |
| <i>Bos indicus</i>             | Zebu                | <i>Mus musculus</i>            | House mouse           |
| <i>Bos Taurus</i>              | Cow                 | <i>Mustela putorius furo</i>   | Domestic ferret       |
| <i>Camelus dromedarius</i>     | Dromedary           | <i>Numida meleagris</i>        | Helmeted guineafowl   |
| <i>Canis lupus familiaris</i>  | Domestic dog        | <i>Nymphicus hollandicus</i>   | Cockatiel             |
| <i>Capra hircus</i>            | Domestic goat       | <i>Oryctolagus cuniculus</i>   | Domestic rabbit       |
| <i>Capreolus capreolus</i>     | Roe deer            | <i>Ovis aries</i>              | Sheep                 |
| <i>Cavia porcellus</i>         | Domestic guinea pig | <i>Ovis aries musimon</i>      | Mouflon               |
| <i>Cervus elaphus</i>          | Red deer            | <i>Pavo cristatus</i>          | Blue peafowl          |
| <i>Chinchilla lanigera</i>     | Chinchilla          | <i>Phasianus colchicus</i>     | Ring-necked pheasant  |
| <i>Columba livia</i>           | Domestic pigeon     | <i>Rangifer tarandus</i>       | Reindeer              |
| <i>Cricetus cricetus</i>       | Common hamster      | <i>Rattus norvegicus</i>       | Brown rat             |
| <i>Dama dama</i>               | Fallow deer         | <i>Rattus rattus</i>           | Black rat             |
| <i>Equus asinus</i>            | Domestic donkey     | <i>Rhombomys opimus</i>        | Great Gerbil          |
| <i>Equus caballus</i>          | Domestic horse      | <i>Serinus canaria</i>         | Canary                |
| <i>Felis catus</i>             | Domestic cat        | <i>Struthio camelus</i>        | Ostrich               |
| <i>Gallus gallus</i>           | Chicken             | <i>Sus scrofa</i>              | Wild boar             |
| <i>Homo sapiens</i>            | Humans              | <i>Sus scrofa domesticus</i>   | Domestic pig          |
| <i>Lagopus lagopus scotica</i> | Red grouse          |                                |                       |

**Table S4.** European states and transcontinental states included in the study, within which information on pathogens was searched using the ENHanCED Infectious Diseases 2 (EID2) database <sup>3,4</sup>.

|                    |                      |                     |
|--------------------|----------------------|---------------------|
| Albania            | Gibraltar            | Norway              |
| Andorra            | Greece               | Poland              |
| Armenia            | Hungary              | Portugal            |
| Austria            | Iceland              | Republic of Belarus |
| Belgium            | Ireland              | Romania             |
| Bosnia-Herzegovina | Italy                | San Marino          |
| Bulgaria           | Kosovo               | Scotland            |
| Channel Islands    | Latvia               | Serbia              |
| Croatia            | Liechtenstein        | Sicily              |
| Cyprus             | Lithuania            | Slovakia            |
| Czech Republic     | Luxembourg           | Slovenia            |
| Denmark            | Macedonia (Republic) | Spain               |
| England            | Malta                | Sweden              |
| Estonia            | Moldova              | Switzerland         |
| Finland            | Monaco               | Ukraine             |
| France             | Montenegro           | Vatican City        |
| Georgia (Republic) | Netherlands          | Wales               |
| Germany            | Northern Ireland     |                     |



**Table S5.** Climate terms grouped into eleven sets (hereafter referred to as climate drivers) for which paper scoring was undertaken (see Figure S1).

| <b>Climate driver grouping</b> | <b>Climate driver</b>       | <b>Climate driver grouping</b> | <b>Climate driver</b>   |
|--------------------------------|-----------------------------|--------------------------------|-------------------------|
| <b>Altitude</b>                | Altitude                    | <b>Salinity</b>                | Salinity                |
| <b>Climate change</b>          | Climate change              | <b>Temperature</b>             | Air temperature         |
| <b>Extreme weather event</b>   | Cyclone                     |                                | Air temperatures        |
|                                | Extreme weather             |                                | Ambient temperature     |
|                                | Flood                       |                                | Ambient temperatures    |
|                                | Flooding                    |                                | Elevated temperature    |
|                                | Heat wave                   |                                | Elevated temperatures   |
|                                | Hurricane                   |                                | Freezing                |
|                                | Storm                       |                                | High temperature        |
| <b>Moisture</b>                | Absolute humidity           |                                | High temperatures       |
|                                | Dew point                   |                                | Higher temperature      |
|                                | Humid                       |                                | Higher temperatures     |
|                                | Humidity                    |                                | Increased temperature   |
|                                | Relative humidity           |                                | Increased temperatures  |
|                                | Saturation deficit          |                                | Low temperature         |
|                                | Soil moisture               |                                | Low temperatures        |
| <b>Oscillations</b>            | El Niño                     |                                | Lower temperatures      |
|                                | La Niña                     |                                | Maximum temperature     |
|                                | North Atlantic Oscillation  |                                | Mean annual temperature |
|                                | Pacific Decadal Oscillation |                                | Mean temperature        |
| <b>Particle matter</b>         | Dust                        |                                | Minimum temperature     |
|                                | Dusty                       |                                | Summer temperatures     |
|                                | Turbidity                   |                                | Warm temperature        |
| <b>Rainfall</b>                | Annual rainfall             |                                | warm temperatures       |
|                                | Drought                     |                                | Warm years              |
|                                | Dry                         |                                | Warmer temperatures     |
|                                | Heavy rain                  |                                | Winter temperatures     |
|                                | High rainfall               | <b>Wind</b>                    | Wind                    |
|                                | Monsoon                     |                                | Wind speed              |
|                                | Precipitation               |                                | Windy                   |
|                                | Rain                        | <b>Vegetation</b>              | NDVI                    |
|                                | Rainfall                    |                                |                         |
|                                | Rainy season                |                                |                         |
|                                | Runoff                      |                                |                         |
|                                | Wet conditions              |                                |                         |
|                                | Wet season                  |                                |                         |

**Table S6.** The results of a systematic review of the scientific literature examining the sensitivity to climate drivers of the top 100 human and domestic animal pathogens of Europe <sup>2</sup>. For each paper reviewed, final scores were based upon the type of analysis, the strength of statistical evidence for an effect of a climate driver acting upon a pathogen and whether the publication suggested that the climate driver effect did or did not affect the pathogen. For each pathogen and climate driver combination with a positive median score, the final minimum, median and maximum scores from papers examined are presented, including information on the PMIDs (also indicating the number of papers reviewed).

| Pathogen name                    | Climate Driver         | Minimum score | Median score | Maximum score | PMIDs of papers                             |
|----------------------------------|------------------------|---------------|--------------|---------------|---------------------------------------------|
| <i>Acinetobacter baumannii</i>   | Moisture               | 60            | 70           | 80            | 11591541,8940416                            |
| <i>Acinetobacter baumannii</i>   | Particle matter        | 20            | 50           | 80            | 15566039,18247474                           |
| <i>Acinetobacter baumannii</i>   | Temperature            | 80            | 80           | 80            | 19031546                                    |
| <i>Aeromonas hydrophila</i>      | Extreme weather events | 20            | 20           | 20            | 12113407                                    |
| <i>Aeromonas hydrophila</i>      | Moisture               | 20            | 20           | 20            | 10946412                                    |
| <i>Aeromonas hydrophila</i>      | Rainfall               | 20            | 20           | 20            | 8513068                                     |
| <i>Aeromonas hydrophila</i>      | Salinity               | 15            | 20           | 40            | 31839,16345850,15678554                     |
| <i>Anaplasma phagocytophilum</i> | Altitude               | 20            | 20           | 20            | 17993656                                    |
| <i>Anaplasma phagocytophilum</i> | Climate change         | 40            | 40           | 40            | 18634803                                    |
| <i>Anaplasma phagocytophilum</i> | Moisture               | -20           | 20           | 40            | 18047394,18429692,18260527, 20618646        |
| <i>Anaplasma phagocytophilum</i> | Rainfall               | 80            | 80           | 80            | 15857659,18429692                           |
| <i>Anaplasma phagocytophilum</i> | Temperature            | 40            | 40           | 40            | 18634803                                    |
| <i>Anaplasma phagocytophilum</i> | Vegetation             | 40            | 40           | 40            | 18047394                                    |
| <i>Ascaris suum</i>              | Altitude               | 20            | 20           | 20            | 2787072                                     |
| <i>Aspergillus niger</i>         | Altitude               | 80            | 80           | 80            | 16822572                                    |
| <i>Aspergillus niger</i>         | Moisture               | -40           | 20           | 80            | 6402980,16687184,16772229, 16891107         |
| <i>Aspergillus niger</i>         | Salinity               | 15            | 15           | 15            | 562476                                      |
| <i>Aspergillus niger</i>         | Wind                   | 40            | 60           | 80            | 16772229,21328007                           |
| <i>Bacillus anthracis</i>        | Climate change         | 40            | 40           | 40            | 20231894                                    |
| <i>Bacillus anthracis</i>        | Moisture               | 5             | 5            | 5             | 19720074                                    |
| <i>Bacillus anthracis</i>        | Particle matter        | 15            | 15           | 80            | 18487406,15078521,21835070,20193714,1693679 |
| <i>Bacillus anthracis</i>        | Rainfall               | 5             | 22.5         | 40            | 19720074,18165531                           |
| <i>Bacillus anthracis</i>        | Temperature            | 5             | 5            | 5             | 19720074                                    |
| <i>Bacillus anthracis</i>        | Vegetation             | 5             | 5            | 5             | 19720074                                    |
| <i>Bacillus anthracis</i>        | Wind                   | -20           | 10           | 10            | 7973702,9633664,10475972                    |
| <i>Bacillus cereus</i>           | Particle matter        | 20            | 20           | 20            | 17145080, 10212408                          |
| <i>Bacillus licheniformis</i>    | Particle matter        | 20            | 20           | 20            | 18321601                                    |
| <i>Bacillus subtilis</i>         | Moisture               | 15            | 15           | 15            | 19040453                                    |

|                                      |                        |     |    |    |                                              |
|--------------------------------------|------------------------|-----|----|----|----------------------------------------------|
| <i>Bacteroides fragilis</i>          | Temperature            | 80  | 80 | 80 | 20851970                                     |
| <i>Bartonella henselae</i>           | Moisture               | 20  | 50 | 80 | 7561200,12680718                             |
| <i>Bartonella henselae</i>           | Rainfall               | 80  | 80 | 80 | 7561200                                      |
| <b>Bluetongue Virus</b>              | Altitude               | -10 | 80 | 80 | 18922155,17997043,15189233,11732415,15934613 |
| <b>Bluetongue Virus</b>              | Climate change         | 5   | 5  | 80 | 15685226,21151914,20167199,18799177,21570141 |
| <b>Bluetongue Virus</b>              | Moisture               | -10 | 60 | 80 | 18922155,12109708,15189233,19493190,11732415 |
| <b>Bluetongue Virus</b>              | Temperature            | 40  | 80 | 80 | 20179768,17997043,11004778,14651652,20377730 |
| <b>Bluetongue Virus</b>              | Vegetation             | 40  | 40 | 80 | 17997043,15189233,18498611                   |
| <b>Bluetongue Virus</b>              | Wind                   | 5   | 20 | 40 | 19687037,19376658,18639355,18649960,21300413 |
| <i>Borrelia burgdorferi</i>          | Altitude               | 20  | 80 | 80 | 1951802,19685082,17417957,19492952,17695026  |
| <i>Borrelia burgdorferi</i>          | Climate change         | 5   | 20 | 20 | 15006781,19685082,18262840,18634803,19536444 |
| <i>Borrelia burgdorferi</i>          | Moisture               | 5   | 80 | 80 | 19685082,18262840,17417957,17203287,21175072 |
| <i>Borrelia burgdorferi</i>          | Oscillations           | 80  | 80 | 80 | 12680924                                     |
| <i>Borrelia burgdorferi</i>          | Rainfall               | -80 | 80 | 80 | 16669698,9169184,15857659,12653136,15228815  |
| <i>Borrelia burgdorferi</i>          | Temperature            | 15  | 15 | 15 | 7790468                                      |
| <i>Borrelia burgdorferi</i>          | Vegetation             | 80  | 80 | 80 | 16606998                                     |
| <b>Bovine Herpesvirus 1</b>          | Altitude               | 80  | 80 | 80 | 21501883                                     |
| <b>Bovine Herpesvirus 1</b>          | Temperature            | 20  | 20 | 20 | 18304663                                     |
| <b>Bovine Viral Diarrhea Virus 1</b> | Altitude               | 80  | 80 | 80 | 21822791                                     |
| <i>Brucella abortus</i>              | Moisture               | 20  | 20 | 20 | 7949352                                      |
| <i>Brucella abortus</i>              | Oscillations           | 5   | 5  | 5  | 12414142                                     |
| <i>Campylobacter coli</i>            | Temperature            | 15  | 60 | 60 | 9464397,10389249,11168729                    |
| <i>Campylobacter jejuni</i>          | Moisture               | 60  | 60 | 60 | 16830853                                     |
| <i>Campylobacter jejuni</i>          | Rainfall               | -20 | 20 | 80 | 20891037,20965083,6092418,6330161,14662945   |
| <b>Canine Distemper Virus</b>        | Rainfall               | 80  | 80 | 80 | 18575601                                     |
| <i>Chlamydia trachomatis</i>         | Altitude               | 80  | 80 | 80 | 18394663                                     |
| <i>Chlamydia trachomatis</i>         | Extreme weather events | 40  | 40 | 40 | 18955385                                     |
| <i>Chlamydia trachomatis</i>         | Moisture               | 20  | 50 | 80 | 21829735,20608763                            |
| <i>Chlamydia trachomatis</i>         | Rainfall               | 20  | 50 | 80 | 10227221,21829735                            |
| <i>Chlamydophila abortus</i>         | Particle matter        | 20  | 20 | 20 | 20976071,18230187                            |
| <i>Chlamydophila pneumoniae</i>      | Moisture               | 60  | 60 | 60 | 8368846                                      |
| <i>Chlamydophila psittaci</i>        | Particle matter        | 5   | 20 | 20 | 20976071,18977610,18230187                   |
| <b>Classical Swine Fever Virus</b>   | Moisture               | 15  | 15 | 15 | 15158066                                     |
| <b>Classical Swine Fever Virus</b>   | Temperature            | 15  | 15 | 15 | 15158066,1335310                             |
| <b>Classical Swine Fever Virus</b>   | Wind                   | -40 | 20 | 80 | 14623411,11601514                            |
| <i>Clostridium botulinum</i>         | Particle matter        | 5   | 15 | 20 | 7005856,20004414,6400580,19831311            |
| <i>Clostridium botulinum</i>         | Wind                   | 20  | 20 | 20 | 7005856                                      |
| <i>Clostridium difficile</i>         | Rainfall               | 20  | 20 | 20 | 2666437                                      |
| <i>Clostridium perfringens</i>       | Extreme weather events | 20  | 20 | 80 | 15899275,17141293,18804835,11976088,12474967 |
| <i>Clostridium perfringens</i>       | Particle matter        | 20  | 80 | 80 | 21492899,14711629,21571877                   |
| <i>Coxiella burnetii</i>             | Moisture               | 15  | 15 | 15 | 21563011                                     |

|                                     |                        |     |      |    |                                              |
|-------------------------------------|------------------------|-----|------|----|----------------------------------------------|
| <i>Coxiella burnetii</i>            | Particle matter        | 5   | 17.5 | 20 | 7671918,15437000,21571877,9525780            |
| <i>Coxiella burnetii</i>            | Rainfall               | 20  | 80   | 80 | 21810740,15324547,11443552                   |
| <i>Coxiella burnetii</i>            | Wind                   | 5   | 80   | 80 | 15324547,15324553,10400556,16284874,16481501 |
| <i>Cryptococcus neoformans</i>      | Moisture               | 20  | 50   | 80 | 15965721,10206749                            |
| <i>Cryptococcus neoformans</i>      | Rainfall               | -40 | 20   | 80 | 8648227,10468126                             |
| <i>Cryptosporidium parvum</i>       | Extreme weather events | 80  | 80   | 80 | 9790442                                      |
| <i>Cryptosporidium parvum</i>       | Particle matter        | -40 | 60   | 80 | 17583766,18367230,19539587                   |
| <i>Cryptosporidium parvum</i>       | Rainfall               | 15  | 60   | 80 | 8035045,18367230,20637489,12406745,16488039  |
| <i>Cryptosporidium parvum</i>       | Salinity               | 60  | 60   | 80 | 16672482,10628695,10799838,18026231          |
| <i>Cryptosporidium parvum</i>       | Temperature            | 15  | 80   | 80 | 16047784,8919806,8919806,16000797,20023095   |
| <i>Echinococcus granulosus</i>      | Climate change         | 5   | 5    | 5  | 21802208                                     |
| <i>Echinococcus granulosus</i>      | Extreme weather events | 5   | 5    | 5  | 21802208                                     |
| <i>Echinococcus granulosus</i>      | Moisture               | 60  | 60   | 60 | 17933466                                     |
| <i>Echinococcus granulosus</i>      | Rainfall               | 5   | 20   | 80 | 2210938,20071084,21802208,2260900,20393798   |
| <i>Echinococcus granulosus</i>      | Temperature            | 5   | 5    | 5  | 21802208                                     |
| <i>Encephalitozoon cuniculi</i>     | Salinity               | 15  | 15   | 15 | 15270118                                     |
| <b>Encephalomyocarditis Virus</b>   | Moisture               | 15  | 15   | 15 | 166928                                       |
| <i>Entamoeba histolytica</i>        | Climate change         | 5   | 5    | 5  | 15567581                                     |
| <i>Entamoeba histolytica</i>        | Moisture               | 60  | 60   | 60 | 12751714                                     |
| <i>Entamoeba histolytica</i>        | Rainfall               | 20  | 20   | 80 | 226490,202045,19248646                       |
| <i>Enterobacter aerogenes</i>       | Temperature            | 15  | 15   | 15 | 1100601                                      |
| <i>Enterobacter cloacae</i>         | Particle matter        | 15  | 15   | 15 | 17655192                                     |
| <i>Enterococcus faecalis</i>        | Salinity               | 60  | 60   | 60 | 20864199                                     |
| <i>Enterococcus faecium</i>         | Temperature            | 15  | 15   | 15 | 6841320                                      |
| <i>Escherichia coli</i>             | Altitude               | 80  | 80   | 80 | 16118577                                     |
| <i>Escherichia coli</i>             | Extreme weather events | 20  | 40   | 80 | 16022790,10401868,11581467,16913133,16955897 |
| <i>Escherichia coli</i>             | Wind                   | 80  | 80   | 80 | 12966970,18605570,19320169,16310242,18242661 |
| <i>Escherichia coli</i> O157:h7     | Extreme weather events | 5   | 12.5 | 20 | 18174909,15371222                            |
| <i>Escherichia coli</i> O157:h7     | Rainfall               | 80  | 80   | 80 | 18174909                                     |
| <i>Fasciola hepatica</i>            | Altitude               | 5   | 20   | 80 | 16150452,10444322,11769277,18205983,20071083 |
| <i>Fasciola hepatica</i>            | Climate change         | 10  | 20   | 20 | 21249228,19556065,21493511                   |
| <i>Fasciola hepatica</i>            | Extreme weather events | 10  | 20   | 20 | 17933308,21493511,3631704                    |
| <i>Fasciola hepatica</i>            | Moisture               | 20  | 40   | 80 | 9735915,9735916,15110406,15682338,20464681   |
| <i>Fasciola hepatica</i>            | Rainfall               | 20  | 40   | 80 | 21249228,20227416,20887726,21055879,21111536 |
| <i>Fasciola hepatica</i>            | Temperature            | -40 | 20   | 80 | 10444322,9735915,20071083,2050981,978356     |
| <i>Fasciola hepatica</i>            | Vegetation             | 40  | 40   | 40 | 9735915                                      |
| <b>Foot-and-Mouth Disease Virus</b> | Moisture               | 15  | 15   | 15 | 4337217                                      |
| <b>Foot-and-Mouth Disease Virus</b> | Wind                   | 20  | 20   | 20 | 12002549,12002550                            |

|                                     |                        |     |      |    |                                              |
|-------------------------------------|------------------------|-----|------|----|----------------------------------------------|
| <i>Francisella tularensis</i>       | Rainfall               | 40  | 60   | 80 | 14620945,18385353                            |
| <i>Francisella tularensis</i>       | Temperature            | 80  | 80   | 80 | 14620945                                     |
| <i>Fusarium oxysporum</i>           | Particle matter        | 20  | 20   | 20 | 20820862,3935928,2938009,1702081             |
| <b>Gallid Herpesvirus 2</b>         | Particle matter        | 20  | 20   | 20 | 16290211,16678918,18770332                   |
| <i>Gibberella moniliformis</i>      | Moisture               | -80 | 20   | 80 | 2942448,15487329,20549795                    |
| <i>Gibberella moniliformis</i>      | Rainfall               | 20  | 20   | 60 | 20491926,11789932,2942448,20127546,19003428  |
| <i>Gibberella moniliformis</i>      | Temperature            | -15 | 37.5 | 60 | 18263743,20491926,15487329,8890481           |
| <i>Haemonchus contortus</i>         | Climate change         | 20  | 30   | 40 | 18824303,19556065                            |
| <i>Haemonchus contortus</i>         | Extreme weather events | 15  | 15   | 15 | 8220500                                      |
| <i>Haemonchus contortus</i>         | Moisture               | -20 | 80   | 80 | 1399249,1428508,9668516,18824304,20149541    |
| <i>Haemonchus contortus</i>         | Rainfall               | 15  | 20   | 20 | 2777463,2332275,8220500,9668516,9668516      |
| <i>Haemonchus contortus</i>         | Temperature            | 5   | 20   | 80 | 1428508,8447070,15817209,17011129,16336722   |
| <i>Helicobacter pylori</i>          | Altitude               | -40 | 10   | 80 | 1612475,15810948,21083747,8284633,9218856    |
| <i>Helicobacter pylori</i>          | Rainfall               | -40 | 20   | 80 | 18509453,16151096                            |
| <b>Hepatitis A Virus</b>            | Extreme weather events | 20  | 30   | 40 | 17306323,17037154                            |
| <b>Hepatitis A Virus</b>            | Oscillations           | 20  | 20   | 20 | 15115435                                     |
| <b>Hepatitis A Virus</b>            | Rainfall               | 20  | 20   | 20 | 16980430                                     |
| <b>Hepatitis B Virus</b>            | Rainfall               | 20  | 20   | 20 | 9447780                                      |
| <b>Hepatitis E Virus</b>            | Extreme weather events | -20 | 20   | 20 | 21443914,10492753,12497976,9311635,11003732  |
| <b>Hepatitis E Virus</b>            | Rainfall               | -20 | 20   | 80 | 20801864,17935174,7660427,10492753,12497976  |
| <b>Human Enterovirus C</b>          | Moisture               | 10  | 15   | 15 | 44178,6257161,2984990,20025904               |
| <b>Human Enterovirus C</b>          | Salinity               | 15  | 15   | 15 | 184736                                       |
| <b>Human Herpesvirus 3</b>          | Moisture               | 20  | 20   | 20 | 6519892                                      |
| <b>Human T-Lymphotropic Virus 1</b> | Altitude               | 20  | 20   | 20 | 2777408,10752214                             |
| <b>Influenza A Virus</b>            | Climate change         | 5   | 5    | 5  | 18819672                                     |
| <b>Influenza A Virus</b>            | Moisture               | -80 | 60   | 80 | 18881494,17953482,19663691,20879867,19635124 |
| <b>Influenza A Virus</b>            | Particle matter        | 10  | 15   | 60 | 20435545,17297505,21111917                   |
| <b>Influenza A Virus</b>            | Rainfall               | -80 | 40   | 80 | 19635124,8490980,18509468                    |
| <b>Influenza A Virus</b>            | Salinity               | 15  | 15   | 60 | 2142421,17494568,20521724                    |
| <b>Influenza A Virus</b>            | Temperature            | 40  | 40   | 40 | 20386716                                     |
| <i>Klebsiella oxytoca</i>           | Particle matter        | 20  | 20   | 20 | 10212408,7820386                             |
| <i>Klebsiella pneumoniae</i>        | Moisture               | -40 | 27.5 | 40 | 18260762,18260762,21966489,1499666           |
| <i>Legionella pneumophila</i>       | Particle matter        | 80  | 80   | 80 | 19120656,10281778                            |
| <i>Legionella pneumophila</i>       | Rainfall               | 20  | 20   | 20 | 19751596,8285669                             |
| <i>Legionella pneumophila</i>       | Wind                   | 15  | 15   | 15 | 18939571                                     |
| <i>Leishmania donovani</i>          | Altitude               | 20  | 20   | 20 | 20503185                                     |
| <i>Leishmania donovani</i>          | Moisture               | 20  | 20   | 20 | 20503185                                     |
| <i>Leishmania infantum</i>          | Altitude               | 20  | 80   | 80 | 21854702,18986768,9879555                    |
| <i>Leishmania infantum</i>          | Moisture               | 80  | 80   | 80 | 20816927,17017238                            |
| <i>Leishmania infantum</i>          | Rainfall               | 20  | 80   | 80 | 11127239,15975718,20377867,8667372,17017238  |

|                                                            |                        |     |    |    |                                              |
|------------------------------------------------------------|------------------------|-----|----|----|----------------------------------------------|
| <i>Leishmania infantum</i>                                 | Temperature            | 20  | 40 | 80 | 19271999,20816927,20377867,21080321          |
| <i>Leishmania infantum</i>                                 | Wind                   | 80  | 80 | 80 | 17017238                                     |
| <i>Listeria monocytogenes</i>                              | Extreme weather events | 20  | 20 | 20 | 7259653                                      |
| <i>Listeria monocytogenes</i>                              | Particle matter        | 20  | 20 | 80 | 21889781,18321601,18939743                   |
| <i>Listeria monocytogenes</i>                              | Rainfall               | 60  | 70 | 80 | 19339033,21889781                            |
| <i>Listeria monocytogenes</i>                              | Salinity               | -20 | 15 | 20 | 2117874,16371177,18592742                    |
| <i>Listeria monocytogenes</i>                              | Temperature            | 80  | 80 | 80 | 21889781                                     |
| <i>Mannheimia haemolytica</i>                              | Moisture               | 60  | 60 | 60 | 2138372,3417911                              |
| <i>Mannheimia haemolytica</i>                              | Particle matter        | 45  | 45 | 45 | 12567239                                     |
| <i>Mannheimia haemolytica</i>                              | Temperature            | 60  | 60 | 60 | 2138372                                      |
| <i>Moraxella catarrhalis</i>                               | Rainfall               | 40  | 40 | 40 | 18162931                                     |
| <i>Mycobacterium avium</i>                                 | Altitude               | 80  | 80 | 80 | 12680607                                     |
| <i>Mycobacterium avium</i>                                 | Particle matter        | 20  | 20 | 80 | 16349305,11229914,20656861,20036081,21610001 |
| <i>Mycobacterium avium</i>                                 | Rainfall               | 15  | 40 | 60 | 16751517,21239557,17083748                   |
| <i>Mycobacterium avium</i> subsp. <i>paratuberculosis</i>  | Particle matter        | 80  | 80 | 80 | 20656861,20036081,21610001                   |
| <i>Mycobacterium avium</i> subsp. <i>paratuberculosis</i>  | Rainfall               | 80  | 80 | 80 | 16751517,16751517                            |
| <i>Mycobacterium bovis</i>                                 | Altitude               | 80  | 80 | 80 | 16032168                                     |
| <i>Mycobacterium bovis</i>                                 | Extreme weather events | 80  | 80 | 80 | 16618553                                     |
| <i>Mycobacterium tuberculosis</i>                          | Altitude               | 80  | 80 | 80 | 17880701,12887034,16837708                   |
| <i>Mycoplasma pneumoniae</i>                               | Moisture               | -80 | 15 | 40 | 19318345,5686020,5808076,21822990            |
| <i>Mycoplasma pneumoniae</i>                               | Temperature            | 80  | 80 | 80 | 21822990                                     |
| <b>Myxoma Virus</b>                                        | Wind                   | 10  | 10 | 10 | 2881798                                      |
| <i>Neisseria meningitidis</i>                              | Moisture               | 40  | 80 | 80 | 19164421,18983283,12141615                   |
| <i>Neisseria meningitidis</i>                              | Particle matter        | 80  | 80 | 80 | 21511508                                     |
| <i>Neospora caninum</i>                                    | Moisture               | 80  | 80 | 80 | 19210662                                     |
| <i>Neospora caninum</i>                                    | Rainfall               | -80 | 80 | 80 | 14636679,15740859,19210662,21898183          |
| <i>Neospora caninum</i>                                    | Temperature            | -80 | 80 | 80 | 14636679,15471005,15740859                   |
| <b>Newcastle Disease Virus</b>                             | Particle matter        | 80  | 80 | 80 | 5963856                                      |
| <i>Pasteurella multocida</i>                               | Moisture               | 20  | 40 | 60 | 1575496,7373722                              |
| <i>Pasteurella multocida</i>                               | Particle matter        | 45  | 45 | 45 | 12567239                                     |
| <b>Porcine Circovirus</b>                                  | Particle matter        | 80  | 80 | 80 | 19773132                                     |
| <b>Porcine Reproductive and Respiratory Syndrome Virus</b> | Moisture               | 60  | 70 | 80 | 17156739,20667494                            |
| <b>Porcine Reproductive and Respiratory Syndrome Virus</b> | Temperature            | 60  | 60 | 60 | 17156739,20224088                            |
| <i>Porphyromonas gingivalis</i>                            | Temperature            | 15  | 60 | 60 | 7927742,10085036,11014869                    |
| <i>Pseudomonas aeruginosa</i>                              | Moisture               | 10  | 15 | 20 | 21966489,14368472                            |
| <b>Rabies Virus</b>                                        | Altitude               | 20  | 20 | 20 | 17085890                                     |
| <b>Rabies Virus</b>                                        | Rainfall               | 20  | 50 | 80 | 3999245,17255450                             |
| <b>Respiratory Syncytial Virus</b>                         | Altitude               | 5   | 10 | 40 | 3198947,16452353,12671449                    |
| <b>Respiratory Syncytial Virus</b>                         | Moisture               | -10 | 40 | 40 | 19663691,19635124,11864206,15921045,20118684 |

|                                                        |                        |     |    |    |                                              |
|--------------------------------------------------------|------------------------|-----|----|----|----------------------------------------------|
| <b>Respiratory Syncytial Virus</b>                     | Rainfall               | -80 | 20 | 80 | 19635124,11864206,21865418,16678480,22001966 |
| <b>Respiratory Syncytial Virus</b>                     | Wind                   | -10 | 15 | 40 | 11864206,21044325                            |
| <b>Rotavirus A</b>                                     | Extreme weather events | 20  | 20 | 20 | 1653263                                      |
| <b>Rotavirus A</b>                                     | Moisture               | 20  | 20 | 20 | 15022939                                     |
| <b>Rotavirus A</b>                                     | Particle matter        | 20  | 20 | 20 | 2557702                                      |
| <b>Rotavirus A</b>                                     | Rainfall               | 20  | 20 | 80 | 20684698,20684712,2853177,1653263,17385670   |
| <i>Salmonella enterica subsp. enterica enteritidis</i> | Particle matter        | -20 | 20 | 80 | 12558590,8810013,9355251,19237216,21035883   |
| <i>Salmonella enterica subsp. enterica typhimurium</i> | Moisture               | 60  | 60 | 60 | 19054240                                     |
| <i>Salmonella enterica subsp. enterica typhimurium</i> | Particle matter        | 80  | 80 | 80 | 17012158                                     |
| <i>Salmonella enterica subsp. enterica typhimurium</i> | Rainfall               | 20  | 20 | 20 | 18444810                                     |
| <i>Salmonella enterica subsp. enterica typhimurium</i> | Temperature            | 20  | 20 | 20 | 12039728                                     |
| <b>SARS Coronavirus</b>                                | Temperature            | 5   | 5  | 5  | 15035025                                     |
| <i>Serratia marcescens</i>                             | Temperature            | 20  | 20 | 20 | 12077296                                     |
| <i>Shigella dysenteriae</i>                            | Rainfall               | 10  | 20 | 20 | 1099145,9463662,2200700                      |
| <i>Shigella flexneri</i>                               | Extreme weather events | 80  | 80 | 80 | 17602851                                     |
| <i>Shigella flexneri</i>                               | Rainfall               | 20  | 20 | 20 | 2200700,1452309                              |
| <i>Staphylococcus aureus</i>                           | Extreme weather events | 20  | 20 | 20 | 15891349                                     |
| <i>Staphylococcus aureus</i>                           | Moisture               | -40 | 20 | 60 | 21966489,11916706,14612371                   |
| <i>Staphylococcus aureus</i>                           | Salinity               | 80  | 80 | 80 | 21917291                                     |
| <i>Staphylococcus epidermidis</i>                      | Particle matter        | 20  | 20 | 20 | 18321601                                     |
| <i>Streptococcus pneumoniae</i>                        | Climate change         | 80  | 80 | 80 | 19961583                                     |
| <i>Streptococcus pneumoniae</i>                        | Moisture               | 10  | 10 | 10 | 21553207                                     |
| <i>Streptococcus pneumoniae</i>                        | Rainfall               | 10  | 15 | 20 | 10913396,10427935                            |
| <i>Streptococcus pneumoniae</i>                        | Temperature            | 80  | 80 | 80 | 8824973                                      |
| <i>Streptococcus pneumoniae</i>                        | Wind                   | 60  | 60 | 60 | 17126867                                     |
| <b>Suid Herpesvirus 1</b>                              | Moisture               | 60  | 60 | 60 | 2156471                                      |
| <b>Suid Herpesvirus 1</b>                              | Wind                   | 60  | 60 | 60 | 1659567                                      |
| <i>Toxoplasma gondii</i>                               | Altitude               | 80  | 80 | 80 | 18801208,16280199,19246158,20096148,9658447  |
| <i>Toxoplasma gondii</i>                               | Climate change         | 5   | 5  | 5  | 19418068                                     |
| <i>Toxoplasma gondii</i>                               | Extreme weather events | 20  | 20 | 20 | 21281213                                     |
| <i>Toxoplasma gondii</i>                               | Moisture               | 20  | 60 | 60 | 18316161,7431517,16539014                    |
| <i>Toxoplasma gondii</i>                               | Rainfall               | 5   | 80 | 80 | 12076629,16157341,16989836,18452923,19619946 |
| <b>Transmissible Gastroenteritis Virus</b>             | Moisture               | 60  | 60 | 60 | 20228108                                     |
| <b>Transmissible Gastroenteritis Virus</b>             | Temperature            | 60  | 60 | 60 | 20228108                                     |
| <i>Trichinella spiralis</i>                            | Altitude               | 80  | 80 | 80 | 8939049                                      |
| <i>Trichinella spiralis</i>                            | Moisture               | 5   | 5  | 5  | 11099840                                     |
| <i>Trichostrongylus colubriformis</i>                  | Moisture               | -60 | 45 | 60 | 2332277,4661479,7201628,2800302,17152941     |
| <i>Trichostrongylus colubriformis</i>                  | Rainfall               | 20  | 20 | 20 | 2332275,2777463,7735304                      |
| <i>Vibrio cholera</i>                                  | Climate change         | 5   | 5  | 5  | 12364378,1820262                             |

|                                    |                        |     |      |    |                                              |
|------------------------------------|------------------------|-----|------|----|----------------------------------------------|
| <i>Vibrio cholera</i>              | Extreme weather events | 10  | 80   | 80 | 16760521,17123999,18981509,12452126,21537092 |
| <i>Vibrio cholera</i>              | Moisture               | 5   | 22.5 | 40 | 14379012,21415487                            |
| <i>Vibrio cholera</i>              | Oscillations           | 5   | 15   | 60 | 8953025,10865299,15186348,18793311,11220769  |
| <i>Vibrio cholera</i>              | Particle matter        | 80  | 80   | 80 | 21642406,18545963                            |
| <i>Vibrio cholera</i>              | Rainfall               | 5   | 20   | 40 | 19001267,8225749,7148820,1294392,3038946     |
| <i>Vibrio cholera</i>              | Salinity               | 5   | 80   | 80 | 12364378,16085859,21642406                   |
| <i>Vibrio cholera</i>              | Temperature            | 15  | 20   | 80 | 10865299,1294392,2764569,12732548,14602587   |
| <i>Vibrio cholera</i>              | Wind                   | 40  | 40   | 40 | 17384764                                     |
| <i>Vibrio parahaemolyticus</i>     | Extreme weather events | 20  | 20   | 20 | 18697592                                     |
| <i>Vibrio parahaemolyticus</i>     | Oscillations           | 5   | 20   | 40 | 18854707,12462995,6702183                    |
| <i>Vibrio parahaemolyticus</i>     | Particle matter        | 80  | 80   | 80 | 20100246,17921270,20817802,18963158,19732825 |
| <i>Vibrio parahaemolyticus</i>     | Rainfall               | 20  | 20   | 20 | 1294392,9065272,6370564,11248518,22014235    |
| <i>Vibrio parahaemolyticus</i>     | Salinity               | -20 | 20   | 80 | 11000648,20100246,4549489,3183022,367273     |
| <i>Vibrio parahaemolyticus</i>     | Temperature            | 15  | 20   | 80 | 20100246,1294392,19930458                    |
| <b>West Nile Virus</b>             | Climate change         | -5  | 5    | 80 | 18799177,20181272,19580695,19412377,11419587 |
| <b>West Nile Virus</b>             | Extreme weather events | -10 | 20   | 80 | 17479899,17953117,18439367,8835346,11192289  |
| <b>West Nile Virus</b>             | Moisture               | 40  | 40   | 80 | 19654911,18279008,19664833,16599151,16507476 |
| <b>West Nile Virus</b>             | Rainfall               | -40 | 40   | 80 | 19654911,19057643,16459215,21802710,18799177 |
| <b>West Nile Virus</b>             | Temperature            | 5   | 40   | 60 | 18584026,19654911,16459215,19406093,18279008 |
| <b>West Nile Virus</b>             | Vegetation             | 40  | 40   | 60 | 16011435,19054585,19440960                   |
| <i>Yersinia pestis</i>             | Climate change         | 20  | 20   | 20 | 16924109                                     |
| <i>Yersinia pestis</i>             | Oscillations           | -40 | 40   | 40 | 18765356,10586917,20810830,20810830,11340502 |
| <i>Yersinia pestis</i>             | Rainfall               | 5   | 20   | 80 | 11927030,19584125,6364800,13115987,18197776  |
| <i>Yersinia pseudotuberculosis</i> | Extreme weather events | 20  | 20   | 20 | 3284516                                      |
| <i>Yersinia pseudotuberculosis</i> | Rainfall               | 10  | 20   | 20 | 7779969,16030939,3284516                     |



**Table S7.** Results (P values) of Fisher’s Exact test comparisons of the frequency of positive median evidence for sensitivity to climate drivers (0, 1, 2, 3, 4+) compared to (a) the taxonomic division of pathogens, and (b) the transmission routes of pathogens. P values in bold show significant (P<0.05) differences.

| (a)              | Bacteria     | Fungi        | Helminths    | Protozoa     |
|------------------|--------------|--------------|--------------|--------------|
| <b>Fungi</b>     | 0.234        |              |              |              |
| <b>Helminths</b> | <b>0.030</b> | <b>0.012</b> |              |              |
| <b>Protozoa</b>  | <b>0.005</b> | 0.072        | 0.344        |              |
| <b>Viruses</b>   | <b>0.045</b> | 0.382        | <b>0.001</b> | <b>0.002</b> |

| (b) |               | dcont <sup>a</sup> | sex <sup>a</sup> | soil <sup>a</sup> | water <sup>a</sup> | air <sup>a</sup> | fomite <sup>a</sup> | vector <sup>a</sup> |
|-----|---------------|--------------------|------------------|-------------------|--------------------|------------------|---------------------|---------------------|
|     | <b>sex</b>    | 0.817              |                  |                   |                    |                  |                     |                     |
|     | <b>soil</b>   | 0.353              | 0.437            |                   |                    |                  |                     |                     |
|     | <b>water</b>  | <b>0.001</b>       | <b>0.007</b>     | 0.498             |                    |                  |                     |                     |
|     | <b>air</b>    | 0.739              | 0.431            | 0.600             | <b>0.026</b>       |                  |                     |                     |
|     | <b>fomite</b> | 0.993              | 0.865            | 0.519             | <b>0.005</b>       | 0.822            |                     |                     |
|     | <b>vector</b> | <b>&lt;0.001</b>   | <b>0.010</b>     | 0.813             | 0.191              | <b>0.011</b>     | <b>0.004</b>        |                     |
|     | <b>food</b>   | <b>0.028</b>       | 0.171            | 0.918             | 0.407              | 0.176            | 0.100               | 0.190               |

<sup>a</sup> Transmission routes include: airborne (via inhalation) (air), direct (non-sexual) contact (dcont), fomite (fomite), foodborne (via ingestion) (food), direct sexual contact - (sex), soil-borne (soil), vector-borne (vector) and waterborne (water).

## References

- 1 McIntyre, K. M., Hawkes, I., Waret-Szkuta, A., Morand, S. & Baylis, M. The H-Index as a Quantitative Indicator of the Relative Impact of Human Diseases. *PLoS One* **6**, e1955810. doi: 1371/journal.pone.0019558 (2011).
- 2 McIntyre, K. M. *et al.* A Quantitative Prioritisation of Human and Domestic Animal Pathogens in Europe. *PLoS One* **9**, e103529. doi:10.1371/journal.pone.0103529 (2014).
- 3 McIntyre, K. M. *et al.* Using open-access taxonomic and spatial information to create a comprehensive database for the study of Mammalian and avian livestock and pet infections. *Prev. Vet. Med.* **116**, 325-335, doi:10.1016/j.prevetmed.2013.07.002 (2014).
- 4 Wardeh, M., Risley, C., McIntyre, M. K., Setzkorn, C. & Baylis, M. Database of host-pathogen and related species interactions, and their global distribution. *Sci. Data* **2**, 150049, doi:10.1038/sdata.2015.49 (2015).
- 5 National Center for Biotechnology Information, "PubMed" ([www.ncbi.nlm.nih.gov/pubmed/](http://www.ncbi.nlm.nih.gov/pubmed/)) (U.S. National Library of Medicine, Bethesda, Maryland, USA).
- 6 National Center for Biotechnology Information, "The NCBI Taxonomy database homepage" ([www.ncbi.nlm.nih.gov/Taxonomy/](http://www.ncbi.nlm.nih.gov/Taxonomy/)) (U.S. National Library of Medicine, Bethesda, Maryland, USA).
- 7 International Committee on Taxonomy of Viruses (ICTV). ([www.ictvdb.org/Ictv/index.htm](http://www.ictvdb.org/Ictv/index.htm)). (2012).
- 8 Aitken, I. *Diseases of sheep* (Blackwell, Oxford, UK, 2007).

- 9 Calnek, B. W. , Barnes, H. J., Beard, C. W. & McDougald, L. R. (eds.) *Diseases of poultry* (Wiley, 1997).
- 10 Coetzer, J. A. W. & Tustin, R. C. *Infectious diseases of livestock* (OUP Southern Africa, 2005).
- 11 Green, C. E. *Infectious diseases of the dog and cat* (Elsevier Saunders, 2012).
- 12 Harcourt-Brown, F. *Textbook of rabbit medicine* (Butterworth-Heinemann, 2001).
- 13 Magill, A. J., Ryan, E. T., Solomon, T. & Hill, D. R. *Hunter's tropical medicine and emerging infectious disease* (Elsevier Saunders, 2012).
- 14 Mandell, G. I., Bennett, J. D. & Dolin, R. *Principles and practice of infectious diseases* (Churchill Livingstone, 2009).
- 15 Straw, B. E. *Diseases of swine* (Wiley-Blackwell, 2006).
- 16 Taylor, L. H., Latham, S. M. & Woolhouse, M. E. J. Risk factors for human disease emergence. *Philos. T. Roy. Soc. B* **356**, 983-989 (2001).
- 17 Woolhouse, M. E. J. & Gowtage-Sequeria, S. Host range and emerging and reemerging pathogens. *Emerg. Infect. Dis.* **11**, 1842-1847 (2005).
- 18 Jones, K. E. *et al.* Global trends in emerging infectious diseases. *Nature* **451**, 990-994, doi:10.1038/nature06536 (2008).
- 19 R Core Team. R: A Language and Environment for Statistical Computing v. Version 3.0.1 (2013-05-16) - "Good Sport" (Copyright (C) 2013 The R Foundation for Statistical Computing, Vienna, Austria, 2013).
